# Supplementary material for: How to Produce an Alternative Carbon Source for Denitrification by Treating and Drastically Reducing Biological Sewage Sludge
Source: MDPI journal article supplement (doi:10.3390/membranes11120977), 2021-12-12
Supplement: s1 [file s1]

## Article

# How to Produce an Alternative Carbon Source for Denitrification by Treating and Drastically Reducing Biological Sewage Sludge

Maria Cristina Collivignarelli <sup>1,2,\*</sup>, Alessandro Abbà <sup>3</sup>, Francesca Maria Caccamo <sup>1</sup>, Marco Carnevale Miino <sup>1</sup>, Angela Durante <sup>4</sup>, Stefano Bellazzi <sup>1</sup>, Marco Baldi <sup>5</sup> and Giorgio Bertanza <sup>3</sup>

<sup>1</sup> Department of Civil Engineering and Architecture, University of Pavia, via Ferrata 3, 27100 Pavia, Italy; francescamaria.caccamo01@universitadipavia.it (F.M.C.); marco.carnevalemiino01@universitadipavia.it (M.C.M.); stefano.bellazzi01@universitadipavia.it (S.B.)

<sup>2</sup> Interdepartmental Centre for Water Research, University of Pavia, Via Ferrata 3, 27100 Pavia, Italy

<sup>3</sup> Department of Civil, Environmental, Architectural Engineering and Mathematics, University of Brescia, Via Branze 43, 25123 Brescia, Italy; alessandro.abba@unibs.it (A.A.); giorgio.bertanza@unibs.it (G.B.)

<sup>4</sup> Freelance Chemist, Via Carducci 12, Casirate d'Adda, 24040 Bergamo, Italy; angela.durante@pec.chimici.it

<sup>5</sup> Department of Chemistry, University of Pavia, Viale Taramelli 12, 27100 Pavia, Italy; marco.baldi@unipv.it

\* Correspondence: mcristina.collivignarelli@unipv.it

## Supplementary Materials

**Table S1.** NUR values obtained from diverse carbon sources.

| Carbon Source                                                                 | NUR [ $\text{mg}_{\text{N-NO}_3}/(\text{g}_{\text{VSS}} \text{ h})$ ] | References |
|-------------------------------------------------------------------------------|-----------------------------------------------------------------------|------------|
| Organic waste from soft drinks factory                                        | 31.8–48.1                                                             | [1]        |
| Organic waste from sweet factory                                              | 30.4–41.6                                                             | [1]        |
| Acetic acid                                                                   | 6.1 *                                                                 | [2]        |
| Industrial WW (effluents from brewery, distillery, and fish-pickling factory) | 2.6–6.0                                                               | [3]        |
| Methanol                                                                      | 3.2 *                                                                 | [2]        |
| Alcohol-based substance                                                       | 3.0                                                                   | [2]        |
| Glycerine-based substance                                                     | 2.4 *                                                                 | [2]        |
| ThAlMBR permeate                                                              | $1.9 \pm 0.3$                                                         | [4]        |
| Municipal sewage                                                              | 0.6–1.0                                                               | [5]        |

\* In the original study it is reported in [ $\text{mg}_{\text{N-NO}_3}/(\text{g}_{\text{VSS}} \text{ min})$ ]. NUR: nitrate uptake rate; WW: wastewater; ThAlMBR: thermophilic alternate membrane biological reactor.

## References

1. Fernández-Nava, Y.; Marañón, E.; Soons, J.; Castrillón, L. Denitrification of high nitrate concentration wastewater using alternative carbon sources. *J. Hazard. Mater.* **2010**, *173*, 682–688.
2. Liwarska-Bizukojć, E.; Chojnacki, J.; Klink, M.; Olejnik, D. Effect of the type of the external carbon source on denitrification kinetics of wastewater. *Desalin. Water Treat.* **2018**, *101*, 143–150.
3. Swinarski, M.; Makinia, J.; Czerwionka, K.; Chrzanowska, M. Industrial wastewater as an external carbon source for optimization of nitrogen removal at the “Wschod” WWTP in Gdansk (Poland). *Water Sci. Technol.* **2009**, *59*, 57–64.
4. Collivignarelli, M.C.; Abbà, A.; Castagnola, F.; Bertanza, G. Minimization of municipal sewage sludge by means of a thermophilic membrane bioreactor with intermittent aeration. *J. Clean. Prod.* **2017**, *143*, 369–376.
5. Foladori, P.; Andreottola, G.; Ziglio, G. *Sludge Reduction Technologies in Wastewater Treatment Plants*; IWA Publishing: London, UK, 2010.
